# Supplementary material for: The effect of ionizable lipids on the cellular uptake of lipid bilayer coated mesoporous silica nanoparticles in the liver
Source: Royal Society of Chemistry journal article supplement (doi:10.1039/d5tb02579f), 2026-01-01
Supplement: d5tb02579f1.pdf [file d5tb02579f1.pdf]

## Supporting Information

### **The effect of ionizable lipids on the cellular uptake of lipid bilayer coated mesoporous silica nanoparticles in liver**

Junyi Tu <sup>a, b, #</sup>, Runpu Ma <sup>b, c, #</sup>, Wei Jiang <sup>b</sup>, Honghong Yang <sup>b</sup>, Xiayu Shi <sup>b</sup>, Jinhong Jiang <sup>b</sup>, Yuting Li <sup>b, \*</sup> and Xiangsheng Liu <sup>b, \*</sup>

<sup>a</sup> College of Pharmaceutical Science, Zhejiang University of Technology, Zhejiang, Hangzhou 310014, China

<sup>b</sup> Zhejiang Cancer Hospital, Zhejiang Key Laboratory of Functional Nucleic Acids for Basic and Clinical Application, Hangzhou Institute of Medicine, Chinese Academy of Sciences, Hangzhou 310018, China

<sup>c</sup> School of Life Sciences, Faculty of Medicine, Tianjin University, Tianjin 300072, China

<sup>#</sup> Equal contribution

<sup>\*</sup> Corresponding authors

E-mail: [liuxs@him.cas.cn](mailto:liuxs@him.cas.cn) or [xsliu@zju.edu.cn](mailto:xsliu@zju.edu.cn) (X. L.), [liyuting@him.cas.cn](mailto:liyuting@him.cas.cn) (Y. L.)

**A**

|          | Lipid Composition |        |      |      |                         | PBS (Size) |       |
|----------|-------------------|--------|------|------|-------------------------|------------|-------|
|          | MC3               | SM-102 | DSPC | Chol | DMG-PEG <sub>2000</sub> | Size (nm)  | PDI   |
| <b>a</b> | 5                 | /      | 55   | 37   | 3                       | 118.8      | 0.078 |
| <b>b</b> | 10                | /      | 50   | 37   | 3                       | 129.9      | 0.102 |
| <b>c</b> | 15                | /      | 45   | 37   | 3                       | 158.4      | 0.114 |
| <b>d</b> | /                 | 10     | 50   | 37   | 3                       | 171.7      | 0.094 |
| <b>e</b> | /                 | 15     | 45   | 37   | 3                       | 180.1      | 0.140 |

**B****10% MC3 I-silicasome**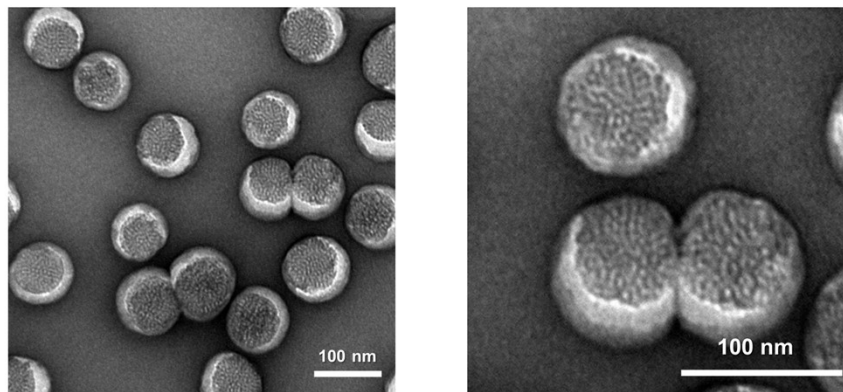

**Supplementary Figure 1. Design and characterization of ionizable silicasomes.** (A) I-silicaomes with different size were synthesized by optimizing the MSNP coated with lipid membranes. Data are presented as mean values, n = 3. (B) Representative TEM images of I-silicasomes containing 10% MC3 (negative staining). Scale bar: 100 nm.

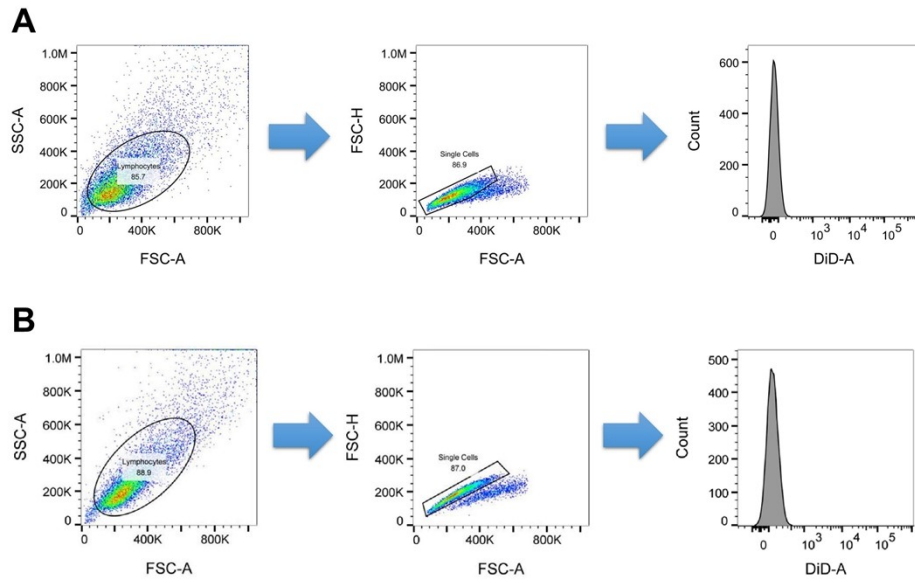

**Supplementary Figure 2.** Gating strategy of (A) DiD<sup>+</sup> Hep3B cells, (B) DiD<sup>+</sup> RAW264.7 cells. Experiment was performed in Thermo Fisher Attune NxT.

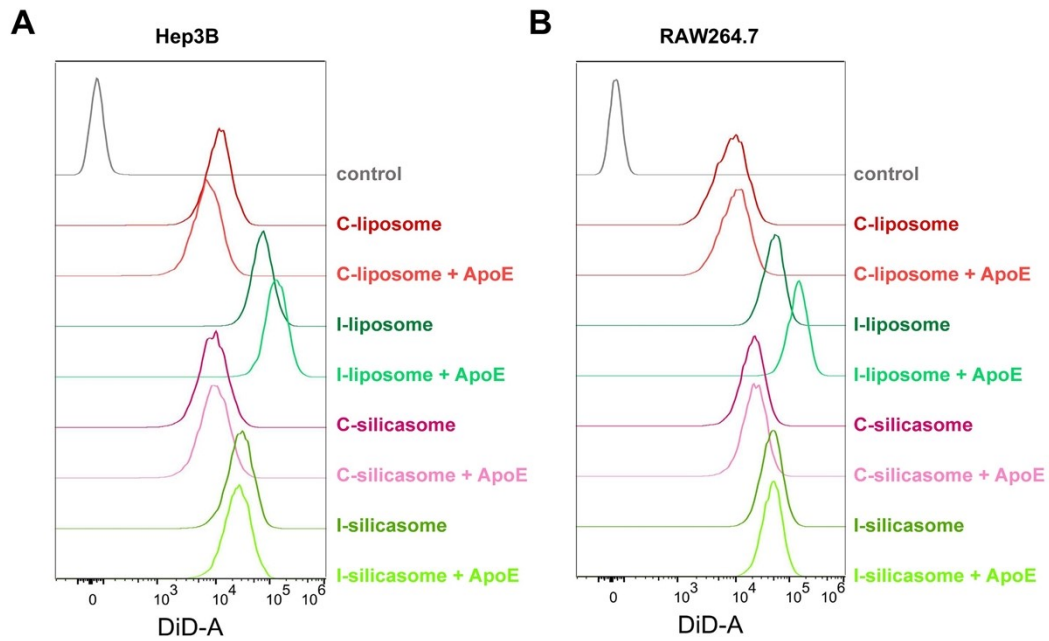

**Supplementary Figure 3. ApoE impact cellular uptake of lipids coated nanoparticles.** Cellular uptake of nanoparticles in (B) Hep3B cells and (D) RAW264.7 cells. Histogram plots of flow cytometry analysis showing nanoparticle internalization in (A) Hep3B hepatocytes and (B) RAW264.7 cells after treatment with or without ApoE-bound formulations.

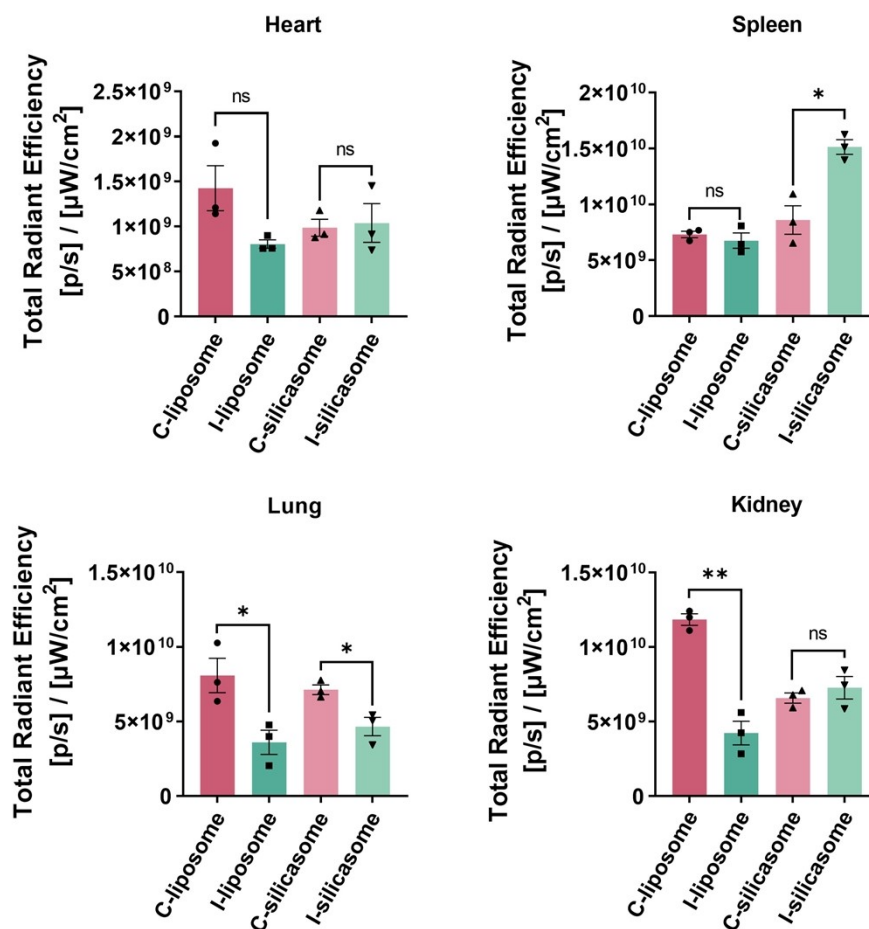

**Supplementary Figure 4.** Quantitative analysis of DiD signal at the position of heart, spleen, lung and kidney in main Figure 5B. Data are presented as mean  $\pm$  SEM,  $n = 3$ .  $*p < 0.05$ ,  $**p < 0.01$ ,  $***p < 0.001$  and ns, no significant difference.

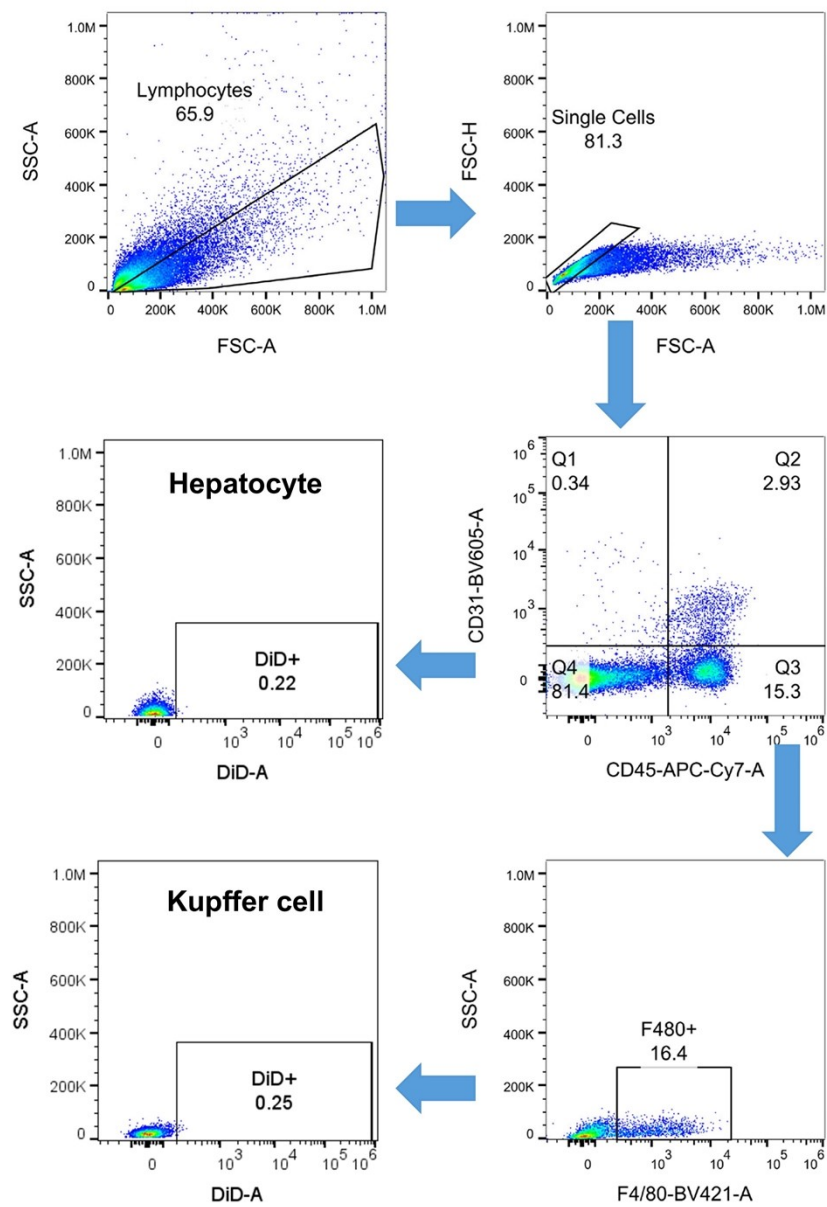

**Supplementary Figure 5.** Gating scheme for flow cytometric analysis of DiD<sup>+</sup> cells from liver cells.
